# Supplementary material for: Outcomes after liver transplantation in Korea: Incidence and risk factors from Korean transplantation registry
Source: PubMed Central journal article supplement — Clin Mol Hepatol. 2021 Feb 2;27(3):451–62. doi: 10.3350/cmh.2020.0292 (PMC8273644; doi:10.3350/cmh.2020.0292), 2021-02-02
Supplement: cmh-2020-0292-suppl1.pdf [file cmh-2020-0292-suppl1.pdf]

**Supplementary Table 1.** Multiple Cox regression analysis for risk factors influencing occurrence of death after liver transplantation

| Variable                                       | Multiple Cox regression |         |                   |         |
|------------------------------------------------|-------------------------|---------|-------------------|---------|
|                                                | Univariate              |         | Multivariate      |         |
|                                                | HR (95% CI)             | P-value | HR (95% CI)       | P-value |
| Death (n=2,367)                                |                         |         |                   |         |
| Recipients' age                                | 1.43 (1.20, 1.70)       | <0.001  | 1.38 (1.15, 1.67) | <0.001  |
| Donors' age                                    | 1.30 (1.18, 1.43)       | <0.001  | –                 | –       |
| Male recipient                                 | 0.88 (0.64, 1.22)       | 0.445   | 1.39 (0.93, 2.08) | 0.108   |
| Male donor                                     | 0.88 (0.65, 1.20)       | 0.425   | –                 | –       |
| Recipients' BMI $\geq 25$ (kg/m <sup>2</sup> ) | 0.87 (0.63, 1.19)       | 0.376   | 0.81 (0.57, 1.15) | 0.242   |
| Donors' BMI $\geq 25$ (kg/m <sup>2</sup> )     | 0.97 (0.69, 1.36)       | 0.848   | –                 | –       |
| LDLT vs. DDLT                                  | 0.29 (0.22, 0.40)       | <0.001  | 0.22 (0.09, 0.53) | <0.001  |
| Hypertension                                   | 1.45 (1.01, 2.07)       | 0.043   | 1.29 (0.85, 1.95) | 0.229   |
| Diabetes mellitus                              | 1.37 (0.99, 1.89)       | 0.060   | 1.01 (0.69, 1.47) | 0.958   |
| MELD score: $\geq 35$                          | 3.39 (2.37, 4.86)       | <0.001  | 1.42 (0.89, 2.25) | 0.140   |
| HCC                                            | 0.81 (0.60, 1.10)       | 0.179   | –                 | –       |
| Acute hepatitis                                | 2.22 (1.28, 3.83)       | 0.004   | 1.53 (0.78, 3.00) | 0.212   |
| ABO incompatible                               | 0.67 (0.41, 1.09)       | 0.105   | 1.44 (0.83, 2.48) | 0.193   |
| Use of steroids                                | 0.28 (0.20, 0.38)       | <0.001  | 0.47 (0.31, 0.71) | <0.001  |
| Use of anti-metabolites                        | 0.33 (0.24, 0.44)       | <0.001  | 0.54 (0.38, 0.78) | <0.001  |
| Use of mTOR inhibitors                         | 0.81 (0.49, 1.31)       | 0.386   | –                 | –       |

HR, hazards ratio; CI, confidence interval; BMI, body-mass index; LDLT, living donor liver transplantation; DDLT, deceased donor liver transplantation; MELD, Model for End-Stage Liver Disease; HCC, hepatocellular carcinoma; mTOR, mammalian target of rapamycin.
