# Supplementary material for: Outcomes after liver transplantation in Korea: Incidence and risk factors from Korean transplantation registry
Source: PubMed Central journal article supplement — Clin Mol Hepatol. 2021 Feb 2;27(3):451–62. doi: 10.3350/cmh.2020.0292 (PMC8273644; doi:10.3350/cmh.2020.0292), 2021-02-02
Supplement: cmh-2020-0292-suppl2.pdf [file cmh-2020-0292-suppl2.pdf]

**Supplementary Table 2.** Multiple Cox regression analysis for risk factors influencing occurrence of graft loss after liver transplantation

| Variable                                       | Multiple Cox regression |         |                   |         |
|------------------------------------------------|-------------------------|---------|-------------------|---------|
|                                                | Univariate              |         | Multivariate      |         |
|                                                | HR (95% CI)             | P-value | HR (95% CI)       | P-value |
| Graft loss (n=2,368)                           |                         |         |                   |         |
| Recipients' age                                | 1.03 (1.01, 1.04)       | 0.002   | 1.24 (1.05, 1.46) | 0.012   |
| Donors' age                                    | 1.02 (1.02, 1.03)       | <0.001  | 1.04 (0.92, 1.17) | 0.536   |
| Male recipient                                 | 0.86 (0.64, 1.17)       | 0.344   | –                 | –       |
| Male donor                                     | 0.89 (0.67, 1.19)       | 0.425   | –                 | –       |
| Recipients' BMI $\geq 25$ (kg/m <sup>2</sup> ) | 0.92 (0.68, 1.25)       | 0.611   | –                 | –       |
| Donors' BMI $\geq 25$ (kg/m <sup>2</sup> )     | 1.01 (0.72, 1.39)       | 0.984   | –                 | –       |
| LDLT vs. DDLT                                  | 0.33 (0.25, 0.43)       | <0.001  | 0.22 (0.09, 0.54) | 0.001   |
| Hypertension                                   | 1.35 (0.96, 1.90)       | 0.081   | –                 | –       |
| Diabetes mellitus                              | 1.23 (0.90, 1.67)       | 0.190   | –                 | –       |
| MELD score: $\geq 35$                          | 2.89 (2.00, 4.19)       | <0.001  | –                 | –       |
| HCC                                            | 0.81 (0.61, 1.08)       | 0.145   | 1.66 (1.13, 2.46) | 0.011   |
| Acute hepatitis                                | 2.45 (1.42, 4.20)       | 0.001   | 1.90 (1.02, 3.55) | 0.044   |
| ABO incompatible                               | 1.42 (0.91, 2.21)       | 0.123   | 1.40 (0.86, 2.29) | 0.177   |
| Use of steroids                                | 0.32 (0.23, 0.44)       | <0.001  | 0.57 (0.39, 0.84) | 0.005   |
| Use of anti-metabolites                        | 0.36 (0.27, 0.48)       | <0.001  | 0.56 (0.40, 0.78) | <0.001  |
| Use of mTOR inhibitors                         | 0.77 (0.48, 1.22)       | 0.264   | –                 | –       |

HR, hazards ratio; CI, confidence interval; BMI, body-mass index; LDLT, living donor liver transplantation; DDLT, deceased donor liver transplantation; MELD, Model for End-Stage Liver Disease; HCC, hepatocellular carcinoma; mTOR, mammalian target of rapamycin.
