# Supplementary material for: Outcomes after liver transplantation in Korea: Incidence and risk factors from Korean transplantation registry
Source: PubMed Central journal article supplement — Clin Mol Hepatol. 2021 Feb 2;27(3):451–62. doi: 10.3350/cmh.2020.0292 (PMC8273644; doi:10.3350/cmh.2020.0292), 2021-02-02
Supplement: cmh-2020-0292-suppl3.pdf [file cmh-2020-0292-suppl3.pdf]

**Supplementary Table 3.** Multiple Cox regression analysis for risk factors influencing occurrence of HCC recurrence after liver transplantation

| Variable                                                          | Multiple Cox regression |         |                   |         |
|-------------------------------------------------------------------|-------------------------|---------|-------------------|---------|
|                                                                   | Univariate              |         | Multivariate      |         |
|                                                                   | HR (95% CI)             | P-value | HR (95% CI)       | P-value |
| HCC recurrence (n=1,492)                                          |                         |         |                   |         |
| Recipients' age                                                   | 0.99 (0.97, 1.02)       | 0.430   | 0.94 (0.74, 1.19) | 0.610   |
| Donors' age                                                       | 1.00 (0.99, 1.01)       | 0.911   | —                 | —       |
| Male recipient                                                    | 2.53 (1.32, 4.86)       | 0.005   | —                 | —       |
| Male donor                                                        | 0.74 (0.50, 1.09)       | 0.130   | —                 | —       |
| Recipients' BMI $\geq 25$ (kg/m <sup>2</sup> )                    | 0.53 (0.47, 1.23)       | 0.472   | —                 | —       |
| Donors' BMI $\geq 25$ (kg/m <sup>2</sup> )                        | 0.98 (0.82, 1.56)       | 0.614   | —                 | —       |
| LDLT vs. DDLT                                                     | 1.18 (0.70, 2.00)       | 0.527   | —                 | —       |
| Hypertension                                                      | 1.38 (0.87, 2.19)       | 0.167   | —                 | —       |
| Diabetes mellitus                                                 | 0.92 (0.58, 1.46)       | 0.732   | —                 | —       |
| MELD score: $\geq 35$                                             | 1.62 (0.53, 2.82)       | 0.326   | 1.58 (0.64, 3.92) | 0.321   |
| HCC                                                               | 19.81 (2.76, 142.02)    | 0.003   | —                 | —       |
| Acute hepatitis                                                   | 1.52 (0.72, 2.96)       | 0.612   | —                 | —       |
| Pretransplant HCC beyond Milan criteria vs. within Milan criteria | 3.19 (1.84, 4.52)       | <0.001  | 3.06 (2.00, 4.69) | <0.001  |
| ABO incompatible                                                  | 0.60 (0.38, 0.95)       | 0.029   | —                 | —       |
| Use of steroids                                                   | 0.86 (0.45, 1.65)       | 0.642   | —                 | —       |
| Use of anti-metabolites                                           | 0.89 (0.57, 1.38)       | 0.595   | —                 | —       |
| Use of mTOR inhibitors                                            | 4.74 (3.20, 7.02)       | <0.001  | 3.42 (2.25, 5.20) | <0.001  |

HCC, hepatocellular carcinoma; HR, hazards ratio; CI, confidence interval; BMI, body-mass index; LDLT, living donor liver transplantation; DDLT, deceased donor liver transplantation; MELD, Model for End-Stage Liver Disease; mTOR, mammalian target of rapamycin.
