# Supplementary material for: Outcomes after liver transplantation in Korea: Incidence and risk factors from Korean transplantation registry
Source: PubMed Central journal article supplement — Clin Mol Hepatol. 2021 Feb 2;27(3):451–62. doi: 10.3350/cmh.2020.0292 (PMC8273644; doi:10.3350/cmh.2020.0292), 2021-02-02
Supplement: cmh-2020-0292-suppl4.pdf [file cmh-2020-0292-suppl4.pdf]

**Supplementary Table 4.** Multiple Cox regression analysis for risk factors influencing occurrence of rejection after liver transplantation

| Variable                                       | Multiple Cox regression |         |                    |         |
|------------------------------------------------|-------------------------|---------|--------------------|---------|
|                                                | Univariate              |         | Multivariate       |         |
|                                                | HR (95% CI)             | P-value | HR (95% CI)        | P-value |
| Rejection (n=2,326)                            |                         |         |                    |         |
| Recipients' age                                | 1.00 (0.98, 1.01)       | 0.783   | 0.90 (0.78, 1.05)  | 0.172   |
| Donors' age                                    | 1.02 (1.01, 1.03)       | 0.001   | 1.068 (0.96, 1.20) | 0.249   |
| Male recipient                                 | 0.89 (0.66, 1.19)       | 0.425   | –                  | –       |
| Male donor                                     | 1.04 (0.78, 1.38)       | 0.815   | –                  | –       |
| Recipients' BMI $\geq 25$ (kg/m <sup>2</sup> ) | 1.03 (0.77, 1.39)       | 0.830   | –                  | –       |
| Donors' BMI $\geq 25$ (kg/m <sup>2</sup> )     | 1.02 (0.74, 1.40)       | 0.911   | –                  | –       |
| LDLT vs. DDLT                                  | 0.62 (0.46, 0.83)       | 0.001   | 0.66 (0.45, 0.99)  | 0.042   |
| Hypertension                                   | 1.14 (0.80, 1.62)       | 0.463   | –                  | –       |
| Diabetes mellitus                              | 1.03 (0.75, 1.41)       | 0.865   | –                  | –       |
| MELD score: $\geq 35$                          | 0.67 (0.38, 1.18)       | 0.164   | –                  | –       |
| HCC                                            | 0.88 (0.67, 1.15)       | 0.349   | –                  | –       |
| Acute hepatitis                                | 0.69 (0.30, 1.58)       | 0.375   | –                  | –       |
| ABO incompatible                               | 0.70 (0.50, 0.98)       | 0.036   | 1.79 (1.24, 2.59)  | 0.002   |
| Use of steroids                                | 1.89 (1.06, 3.39)       | 0.032   | –                  | –       |
| Use of anti-metabolites                        | 1.35 (0.96, 1.90)       | 0.086   | –                  | –       |
| Use of mTOR inhibitors                         | 1.51 (1.05, 2.17)       | 0.025   | –                  | –       |

HR, hazards ratio; CI, confidence interval; BMI, body-mass index; LDLT, living donor liver transplantation; DDLT, deceased donor liver transplantation; MELD, Model for End-Stage Liver Disease; HCC, hepatocellular carcinoma; mTOR, mammalian target of rapamycin.
