# Supplementary material for: Outcomes after liver transplantation in Korea: Incidence and risk factors from Korean transplantation registry
Source: PubMed Central journal article supplement — Clin Mol Hepatol. 2021 Feb 2;27(3):451–62. doi: 10.3350/cmh.2020.0292 (PMC8273644; doi:10.3350/cmh.2020.0292), 2021-02-02
Supplement: cmh-2020-0292-suppl5.pdf [file cmh-2020-0292-suppl5.pdf]

**Supplementary Table 5.** Multiple Cox regression analysis for risk factors influencing occurrence of renal dysfunction after liver transplantation

| Variable                                       | Multiple Cox regression |         |                   |         |
|------------------------------------------------|-------------------------|---------|-------------------|---------|
|                                                | Univariate              |         | Multivariate      |         |
|                                                | HR (95% CI)             | P-value | HR (95% CI)       | P-value |
| Renal dysfunction (n=2,556)                    |                         |         |                   |         |
| Recipients' age                                | 1.03 (1.02, 1.03)       | <0.001  | 1.28 (1.19, 1.38) | <0.001  |
| Donors' age                                    | 1.01 (1.00, 1.01)       | 0.001   | –                 | –       |
| Male recipient                                 | 0.71 (0.62, 0.81)       | <0.001  | 1.03 (0.90, 1.18) | 0.679   |
| Male donor                                     | 1.04 (0.91, 1.19)       | 0.541   | –                 | –       |
| Recipients' BMI $\geq 25$ (kg/m <sup>2</sup> ) | 1.05 (0.89, 1.25)       | 0.512   | –                 | –       |
| Donors' BMI $\geq 25$ (kg/m <sup>2</sup> )     | 1.12 (0.93, 1.34)       | 0.225   | –                 | –       |
| LDLT vs. DDLT                                  | 0.62 (0.54, 0.71)       | <0.001  | 0.79 (0.67, 0.93) | 0.004   |
| Hypertension                                   | 1.34 (1.14, 1.56)       | <0.001  | 1.25 (1.06, 1.47) | 0.007   |
| Diabetes mellitus                              | 1.32 (1.15, 1.52)       | <0.001  | 1.20 (1.04, 1.39) | 0.011   |
| MELD score: $\geq 35$                          | 2.26 (1.73, 2.95)       | <0.001  | 1.81 (1.47, 2.23) | <0.001  |
| HCC                                            | 0.70 (0.61, 0.79)       | <0.001  | –                 | –       |
| Acute hepatitis                                | 1.27 (0.86, 1.89)       | 0.227   | 1.06 (0.78, 1.44) | 0.695   |
| ABO incompatible                               | 1.46 (1.20, 1.78)       | <0.001  | –                 | –       |
| Use of steroids                                | 0.77 (0.64, 0.93)       | 0.007   | 0.82 (0.67, 0.99) | 0.040   |
| Use of anti-metabolites                        | 0.78 (0.68, 0.89)       | <0.001  | –                 | –       |
| Use of mTOR inhibitors                         | 0.92 (0.76, 1.12)       | 0.412   | –                 | –       |

HR, hazards ratio; CI, confidence interval; BMI, body-mass index; LDLT, living donor liver transplantation; DDLT, deceased donor liver transplantation; MELD, Model for End-Stage Liver Disease; HCC, hepatocellular carcinoma; mTOR, mammalian target of rapamycin.
