# Supplementary material for: Outcomes after liver transplantation in Korea: Incidence and risk factors from Korean transplantation registry
Source: PubMed Central journal article supplement — Clin Mol Hepatol. 2021 Feb 2;27(3):451–62. doi: 10.3350/cmh.2020.0292 (PMC8273644; doi:10.3350/cmh.2020.0292), 2021-02-02
Supplement: cmh-2020-0292-suppl6.pdf [file cmh-2020-0292-suppl6.pdf]

**Supplementary Table 6.** Multiple Cox regression analysis for risk factors influencing occurrence of renal failure after liver transplantation

| Variable                                       | Multiple Cox regression |         |                    |         |
|------------------------------------------------|-------------------------|---------|--------------------|---------|
|                                                | Univariate              |         | Multivariate       |         |
|                                                | HR (95% CI)             | P-value | HR (95% CI)        | P-value |
| Renal failure (n=2,561)                        |                         |         |                    |         |
| Recipients' age                                | 1.03 (1.01, 1.05)       | 0.010   | 1.40 (1.15, 1.70)  | <0.001  |
| Donors' age                                    | 1.03 (1.02, 1.04)       | <0.001  | –                  | –       |
| Male recipient                                 | 0.77 (0.54, 1.10)       | 0.151   | 0.84 (0.59, 1.19)  | 0.315   |
| Male donor                                     | 0.80 (0.57, 1.13)       | 0.205   | –                  | –       |
| Recipients' BMI $\geq 25$ (kg/m <sup>2</sup> ) | 1.23 (0.86, 1.75)       | 0.251   | 1.18 (0.83, 1.69)  | 0.349   |
| Donors' BMI $\geq 25$ (kg/m <sup>2</sup> )     | 1.21 (0.84, 1.77)       | 0.311   | –                  | –       |
| LDLT vs. DDLT                                  | 0.20 (0.14, 0.28)       | <0.001  | 0.44 (0.29, 0.66)  | <0.001  |
| Hypertension                                   | 1.53 (1.03, 2.27)       | 0.033   | 1.23 (0.81, 1.88)  | 0.338   |
| Diabetes mellitus                              | 1.47 (1.03, 2.09)       | 0.036   | 1.42 (0.97, 2.08)  | 0.072   |
| MELD score: $\geq 35$                          | 8.49 (5.86, 12.31)      | <0.001  | 5.07 (2.12, 12.13) | <0.001  |
| HCC                                            | 0.51 (0.36, 0.73)       | <0.001  | –                  | –       |
| Acute hepatitis                                | 0.88 (0.35, 2.19)       | 0.782   | –                  | –       |
| ABO incompatible                               | 1.87 (1.03, 3.38)       | 0.039   | –                  | –       |
| Use of steroids                                | 0.36 (0.25, 0.54)       | <0.001  | 0.46 (0.31, 0.69)  | <0.001  |
| Use of anti-metabolites                        | 0.39 (0.28, 0.55)       | <0.001  | 0.53 (0.37, 0.76)  | <0.001  |
| Use of mTOR inhibitors                         | 1.32 (0.83, 2.08)       | 0.240   | –                  | –       |

HR, hazards ratio; CI, confidence interval; BMI, body-mass index; LDLT, living donor liver transplantation; DDLT, deceased donor liver transplantation; MELD, Model for End-Stage Liver Disease; HCC, hepatocellular carcinoma; mTOR, mammalian target of rapamycin.
