# Supplementary material for: Outcomes after liver transplantation in Korea: Incidence and risk factors from Korean transplantation registry
Source: PubMed Central journal article supplement — Clin Mol Hepatol. 2021 Feb 2;27(3):451–62. doi: 10.3350/cmh.2020.0292 (PMC8273644; doi:10.3350/cmh.2020.0292), 2021-02-02
Supplement: cmh-2020-0292-suppl7.pdf [file cmh-2020-0292-suppl7.pdf]

**Supplementary Table 7.** Multiple Cox regression analysis for risk factors influencing occurrence of infections after liver transplantation

| Variable                                       | Multiple Cox regression |         |                   |         |
|------------------------------------------------|-------------------------|---------|-------------------|---------|
|                                                | Univariate              |         | Multivariate      |         |
|                                                | HR (95% CI)             | P-value | HR (95% CI)       | P-value |
| Infections (n=2,563)                           |                         |         |                   |         |
| Recipients' age                                | 1.01 (1.00, 1.02)       | 0.071   | 1.11 (1.03, 1.19) | 0.009   |
| Donors' age                                    | 1.02 (1.01, 1.02)       | <0.001  | —                 | —       |
| Male recipient                                 | 0.79 (0.68, 0.92)       | 0.002   | —                 | —       |
| Male donor                                     | 0.98 (0.85, 1.13)       | 0.738   | —                 | —       |
| Recipients' BMI $\geq 25$ (kg/m <sup>2</sup> ) | 0.94 (0.79, 1.12)       | 0.499   | —                 | —       |
| Donors' BMI $\geq 25$ (kg/m <sup>2</sup> )     | 0.88 (0.73, 1.07)       | 0.197   | —                 | —       |
| LDLT vs. DDLT                                  | 0.49 (0.43, 0.57)       | <0.001  | —                 | —       |
| Hypertension                                   | 0.94 (0.78, 1.13)       | 0.499   | 1.08 (0.85, 1.37) | 0.527   |
| Diabetes mellitus                              | 1.09 (0.94, 1.28)       | 0.257   | 1.09 (0.93, 1.28) | 0.268   |
| MELD score: $\geq 35$                          | 2.49 (1.91, 3.25)       | <0.001  | 1.86 (1.50, 2.30) | <0.001  |
| HCC                                            | 0.74 (0.64, 0.85)       | <0.001  | —                 | —       |
| Acute hepatitis                                | 1.48 (0.99, 2.21)       | 0.051   | 0.83 (0.59, 1.17) | 0.294   |
| ABO incompatible                               | 1.15 (0.94, 1.40)       | 0.168   | 1.10 (0.90, 1.35) | 0.370   |
| Use of steroids                                | 0.38 (0.32, 0.46)       | <0.001  | —                 | —       |
| Use of anti-metabolites                        | 0.62 (0.54, 0.72)       | <0.001  | —                 | —       |
| Use of mTOR inhibitors                         | 1.40 (1.15, 1.69)       | <0.001  | —                 | —       |

HR, hazards ratio; CI, confidence interval; BMI, body-mass index; LDLT, living donor liver transplantation; DDLT, deceased donor liver transplantation; MELD, Model for End-Stage Liver Disease; HCC, hepatocellular carcinoma; mTOR, mammalian target of rapamycin.
