# Supplementary material for: Outcomes after liver transplantation in Korea: Incidence and risk factors from Korean transplantation registry
Source: PubMed Central journal article supplement — Clin Mol Hepatol. 2021 Feb 2;27(3):451–62. doi: 10.3350/cmh.2020.0292 (PMC8273644; doi:10.3350/cmh.2020.0292), 2021-02-02
Supplement: cmh-2020-0292-suppl8.pdf [file cmh-2020-0292-suppl8.pdf]

**Supplementary Table 8.** Multiple Cox regression analysis for risk factors influencing occurrence of surgical complications after liver transplantation

| Variable                                       | Multiple Cox regression |         |                   |         |
|------------------------------------------------|-------------------------|---------|-------------------|---------|
|                                                | Univariate              |         | Multivariate      |         |
|                                                | HR (95% CI)             | P-value | HR (95% CI)       | P-value |
| Surgical complications (n=2,561)               |                         |         |                   |         |
| Recipients' age                                | 1.00 (0.99, 1.01)       | 0.689   | 1.05 (0.96, 1.15) | 0.280   |
| Donors' age                                    | 1.01 (1.00, 1.01)       | 0.059   | –                 | –       |
| Male recipient                                 | 0.95 (0.79, 1.13)       | 0.537   | –                 | –       |
| Male donor                                     | 1.03 (0.87, 1.21)       | 0.771   | –                 | –       |
| Recipients' BMI $\geq 25$ (kg/m <sup>2</sup> ) | 1.32 (1.09, 2.11)       | 0.031   | 1.06 (0.89, 1.25) | 0.533   |
| Donors' BMI $\geq 25$ (kg/m <sup>2</sup> )     | 0.73 (0.51, 1.42)       | 0.846   | –                 | –       |
| LDLT vs. DDLT                                  | 0.94 (0.78, 1.14)       | 0.539   | –                 | –       |
| Hypertension                                   | 0.91 (0.74, 1.14)       | 0.417   | –                 | –       |
| Diabetes mellitus                              | 0.80 (0.66, 0.98)       | 0.028   | 0.79 (0.65, 0.97) | 0.021   |
| MELD score: $\geq 35$                          | 1.72 (1.25, 1.87)       | 0.005   | 1.46 (1.11, 1.92) | 0.007   |
| HCC                                            | 0.93 (0.79, 1.09)       | 0.352   | 0.95 (0.80, 1.13) | 0.550   |
| Acute hepatitis                                | 1.45 (0.94, 1.87)       | 0.650   | –                 | –       |
| ABO incompatible                               | 0.91 (0.73, 1.13)       | 0.388   | –                 | –       |
| Use of steroids                                | 0.86 (0.67, 1.11)       | 0.246   | –                 | –       |
| Use of anti-metabolites                        | 0.91 (0.76, 1.09)       | 0.284   | –                 | –       |
| Use of mTOR inhibitors                         | 0.97 (0.76, 1.24)       | 0.802   | –                 | –       |

HR, hazards ratio; CI, confidence interval; BMI, body-mass index; LDLT, living donor liver transplantation; DDLT, deceased donor liver transplantation; MELD, Model for End-Stage Liver Disease; HCC, hepatocellular carcinoma; mTOR, mammalian target of rapamycin.
