# Supplementary material for: Outcomes after liver transplantation in Korea: Incidence and risk factors from Korean transplantation registry
Source: PubMed Central journal article supplement — Clin Mol Hepatol. 2021 Feb 2;27(3):451–62. doi: 10.3350/cmh.2020.0292 (PMC8273644; doi:10.3350/cmh.2020.0292), 2021-02-02
Supplement: cmh-2020-0292-suppl9.pdf [file cmh-2020-0292-suppl9.pdf]

**Supplementary Table 9.** Multiple Cox regression analysis for risk factors influencing occurrence of NODM after liver transplantation

| Variable                                       | Multiple Cox regression |         |                   |         |
|------------------------------------------------|-------------------------|---------|-------------------|---------|
|                                                | Univariate              |         | Multivariate      |         |
|                                                | HR (95% CI)             | P-value | HR (95% CI)       | P-value |
| NODM (n=2,554)                                 |                         |         |                   |         |
| Recipients' age                                | 1.01 (1.00, 1.03)       | 0.032   | 1.10 (0.98, 1.23) | 0.100   |
| Donors' age                                    | 0.99 (0.99, 1.00)       | 0.034   | —                 | —       |
| Male recipient                                 | 1.08 (0.86, 1.35)       | 0.536   | 1.21 (0.98, 1.51) | 0.082   |
| Male donor                                     | 1.27 (1.02, 1.58)       | 0.031   | —                 | —       |
| Recipients' BMI $\geq 25$ (kg/m <sup>2</sup> ) | 1.37 (1.09, 1.70)       | 0.006   | 1.39 (1.13, 1.71) | 0.002   |
| Donors' BMI $\geq 25$ (kg/m <sup>2</sup> )     | 0.76 (0.59, 0.99)       | 0.039   | —                 | —       |
| LDLT vs. DDLT                                  | 1.30 (1.01, 1.67)       | 0.042   |                   |         |
| Hypertension                                   | 1.02 (0.79, 1.33)       | 0.877   | 0.91 (0.69, 1.19) | 0.490   |
| Diabetes mellitus                              | —                       | —       | —                 | —       |
| MELD score: $\geq 35$                          | 0.78 (0.53, 1.16)       | 0.225   | —                 | —       |
| HCC                                            | 0.88 (0.72, 1.08)       | 0.217   | —                 | —       |
| Acute hepatitis                                | 0.53 (0.26, 1.05)       | 0.068   | —                 | —       |
| ABO incompatible                               | 0.84 (0.64, 1.09)       | 0.185   | —                 | —       |
| Use of steroids                                | 3.03 (1.81, 5.08)       | <0.001  | 3.24 (1.90, 5.54) | <0.001  |
| Use of anti-metabolites                        | 0.74 (0.59, 0.91)       | 0.005   | 0.68 (0.54, 0.84) | <0.001  |
| Use of mTOR inhibitors                         | 0.75 (0.53, 1.06)       | 0.102   | —                 | —       |

NODM, new onset diabetes mellitus; HR, hazards ratio; CI, confidence interval; BMI, body-mass index; LDLT, living donor liver transplantation; DDLT, deceased donor liver transplantation; MELD, Model for End-Stage Liver Disease; HCC, hepatocellular carcinoma; mTOR, mammalian target of rapamycin.
